# Supplementary material for: A combination of metabolite profiling and network pharmacology to explore the potential pharmacological changes of secoisolariciresinol-diglycoside
Source: Royal Society of Chemistry journal article supplement (doi:10.1039/d0ra06382g), 2020-01-01
Supplement: d0ra06382g1.pdf [file d0ra06382g1.pdf]

**A combination of metabolites' profiling and network pharmacology to explore the potential pharmacological changes of secoisolariciresinol-diglycoside in rats**

Fengxiang Zhang<sup>a, #</sup>, Yulinlan Yuan<sup>a, #</sup>, Ziting Li<sup>b</sup>, ShuangShuang Cui<sup>a</sup>, Chang Li<sup>c, \*</sup>, Ruiman Li<sup>a, \*</sup>

<sup>a</sup> Department of gynaecology and obstetrics, The First Affiliated Hospital of Jinan University, Guangzhou 510632, China

<sup>b</sup> Institute of Traditional Chinese Medicine and Natural Products, College of Pharmacy, Jinan University, Guangzhou 510632, China

<sup>c</sup> Department of Medicinal Chemistry and Natural Medicine Chemistry, College of Pharmacy, Harbin Medical University, Harbin 150081, China

\*Corresponding to: Prof. Rui-man Li, Department of gynaecology and obstetrics, the First Affiliated Hospital of Jinan university, Guangzhou 510632, China, Tel: +86 020-38688603, fax: +86 020-38688603 E-mail: hqyyirm@126.com; Dr. Chang Li, Department of Medicinal Chemistry and Natural Medicine Chemistry, College of Pharmacy, Harbin Medical University, Harbin 150081, China, Tel: +86 0451-86685745, fax: +86 0451-86685745 E-mail: lichang661@126.com.

# The author contributes equally to this work



Supplementary materials

**Table S1** The area of SDG and its metabolites in rat's biosamples

| Name       | Plasma   | Urine    | Feces    | Liver    | Spleen | Lung  | Kidney  | Heart   | Brain  |
|------------|----------|----------|----------|----------|--------|-------|---------|---------|--------|
| <b>P1</b>  | 216.74   | 1881.65  | 5447.43  | 366.49   | 38.89  | 131.2 | 609.99  | 57.95   | 20.22  |
| <b>M1</b>  | 0        | 141.36   | 11.12    | 0        | 0      | 0     | 0       | 0       | 0      |
| <b>M2</b>  | 11.98    | 23.72    | 0        | 151.05   | 0      | 0     | 8.29    | 0       | 0      |
| <b>M3</b>  | 0        | 0        | 121.04   | 0        | 0      | 0     | 0       | 0       | 0      |
| <b>M4</b>  | 0        | 0        | 112.05   | 0        | 0      | 0     | 0       | 0       | 0      |
| <b>M5</b>  | 10.86    | 0        | 0        | 148.91   | 0      | 0     | 15.05   | 0       | 0      |
| <b>M6</b>  | 0        | 67.42    | 54.31    | 0        | 0      | 0     | 0       | 0       | 0      |
| <b>M7</b>  | 0        | 1041.02  | 229.14   | 0        | 0      | 0     | 0       | 0       | 0      |
| <b>M8</b>  | 12823.44 | 31464.42 | 309.47   | 11991.84 | 676.01 | 3181  | 6220.73 | 1379.56 | 389.29 |
| <b>M9</b>  | 62.04    | 0        | 0        | 856.22   | 0      | 0     | 593.51  | 0       | 0      |
| <b>M10</b> | 105.17   | 0        | 0        | 330.51   | 0      | 0     | 144.44  | 0       | 0      |
| <b>M11</b> | 0        | 161.02   | 897.46   | 0        | 0      | 0     | 0       | 0       | 0      |
| <b>M12</b> | 0        | 188.02   | 1189.04  | 0        | 0      | 0     | 0       | 0       | 0      |
| <b>M13</b> | 90.98    | 18659.56 | 16888.38 | 1130.45  | 31.59  | 76.49 | 783.75  | 29.48   | 13.86  |
| <b>M14</b> | 439.99   | 115.83   | 0        | 202.53   | 12.64  | 73.85 | 468.01  | 48.47   | 0      |
| <b>M15</b> | 0        | 31.77    | 587.99   | 0        | 0      | 0     | 0       | 0       | 0      |
| <b>M16</b> | 0        | 0        | 184.35   | 0        | 0      | 0     | 0       | 0       | 0      |
| <b>M17</b> | 0        | 132.08   | 2743.81  | 0        | 0      | 0     | 0       | 0       | 0      |
| <b>M18</b> | 38.18    | 37.88    | 0        | 24.61    | 0      | 8.65  | 31.78   | 0       | 0      |
| <b>M19</b> | 0        | 150.63   | 405.39   | 0        | 0      | 0     | 0       | 0       | 0      |
| <b>M20</b> | 0        | 155.39   | 126.46   | 0        | 0      | 0     | 0       | 0       | 0      |
| <b>M21</b> | 44.2     | 179.26   | 344.84   | 842.62   | 9.79   | 28.87 | 462.12  | 0       | 0      |
| <b>M22</b> | 781.91   | 850.71   | 0        | 55.13    | 14.22  | 133.3 | 1368.63 | 50.99   | 9.31   |
| <b>M23</b> | 0        | 83.06    | 0        | 0        | 0      | 0     | 0       | 0       | 0      |

## Supplementary materials

---

---

|            |       |         |          |         |        |       |        |        |       |
|------------|-------|---------|----------|---------|--------|-------|--------|--------|-------|
| <b>M24</b> | 0     | 179.44  | 8823.41  | 0       | 0      | 0     | 0      | 0      | 0     |
| <b>M25</b> | 77.83 | 318.41  | 260.43   | 1079.14 | 0      | 47.71 | 694.92 | 0      | 0     |
| <b>M26</b> | 984.6 | 2884.76 | 17260.35 | 1454.67 | 319.91 | 294.4 | 389.64 | 210.04 | 24.05 |
| <b>M27</b> | 16.34 | 0       | 1486.65  | 55.25   | 12.58  | 11.18 | 37.31  | 0      | 0     |
| <b>M28</b> | 33.29 | 143.26  | 1110.68  | 23.99   | 25.15  | 29.33 | 170.61 | 19.64  | 0     |

---
